# Supplementary material
Source: publisher figshare collection journal article supplement (https://tandf.figshare.com/ndownloader/files/12833129)
Supplement: Supplementary file 1 [file 12833129]

**Supplementary Material**

Synthesis, crystal structure, fluorescence and electrochemical properties of two Ag(I) complexes based on 2-(4'-pyridyl)-benzoxazole/SPPh3 ligands

SHANSHAN MAO, XINTONG HAN, CHUANG LI, GUOZHEN HUANG, KESHENG SHEN, XINKUI SHI and HUILU WU*

**Content**

Table S1. Selected hydrogen bonding distances (Å) and angles (°) for complex **2**.

Figure S1. IR spectrum of complexes **1** and **2**.

Figure S2. Photographic images of ligands and the complexes under ambient light and UV light irradiation.

Figure S3. UV-vis absorption and photoluminescence spectra of 4-PBO and complex **1** in the solid state.

Figure S4. UV-vis absorption and photoluminescence spectra of SPPh3 and complex **2** in the solid state.

Table S1. Selected hydrogen bonding distances (Å) and angles (°) for complex **2**.

| D-H…A | d(D-H) | d(H...A) | d(D...A) | | ∠(DHA) |
| --- | --- | --- | --- | --- | --- |
| C(6)-H(6)...O(2)#2 | 0.93 | 2.51 | | 3.279(11) | 140.6 |
| C(25)-H(25)...O(4)#3 | 0.93 | 2.49 | | 3.275(12) | 141.7 |

Symmetry transformations used to generate equivalent atoms: #2 -x+1,-y+1,-z+1; #3 x,y+1,z


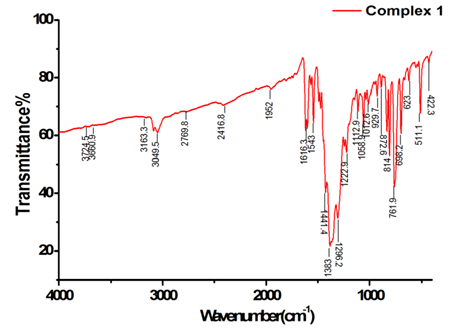

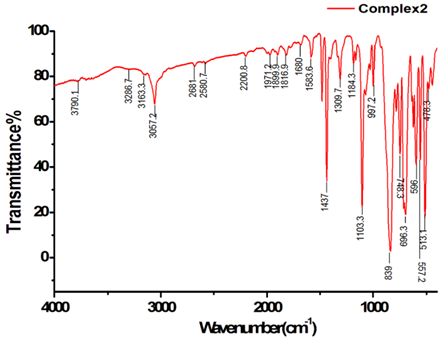


Figure S1. IR spectrum of complexes **1** and **2**.


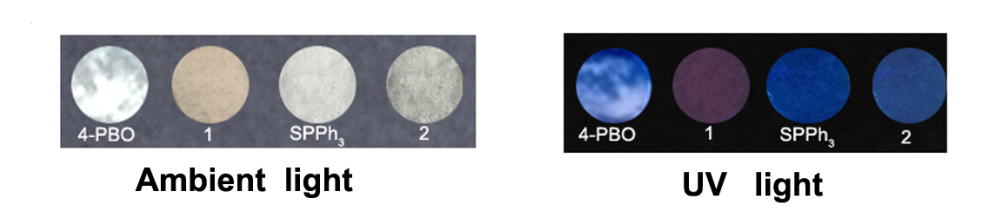


Figure S2. Photographic images of ligands and the complexes under ambient light and UV light irradiation.


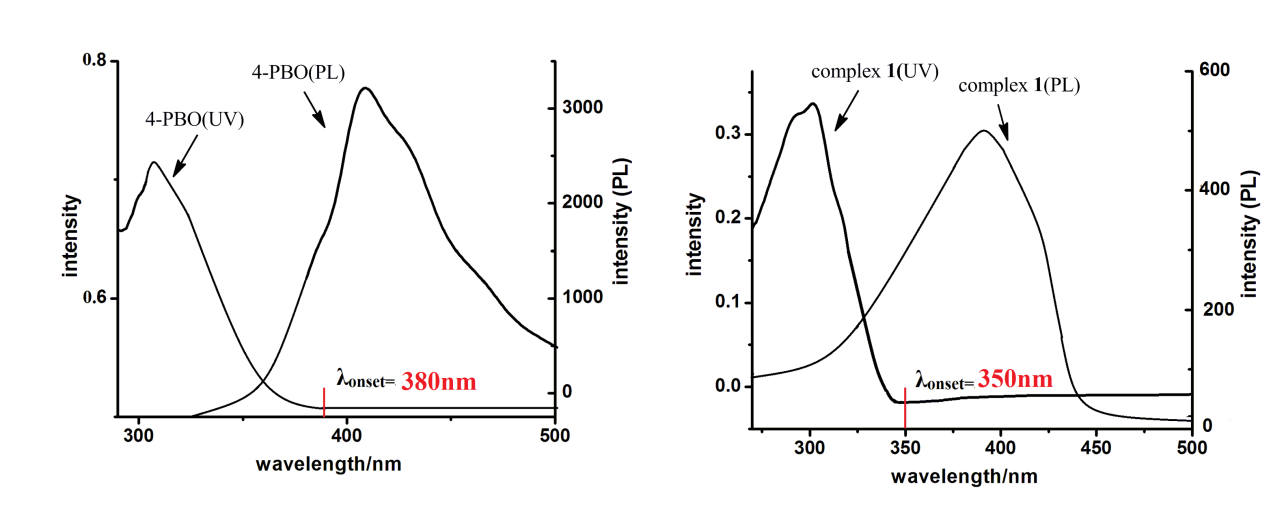


Figure S3. UV-vis absorption and photoluminescence spectra of 4-PBO and complex **1** in the solid state.


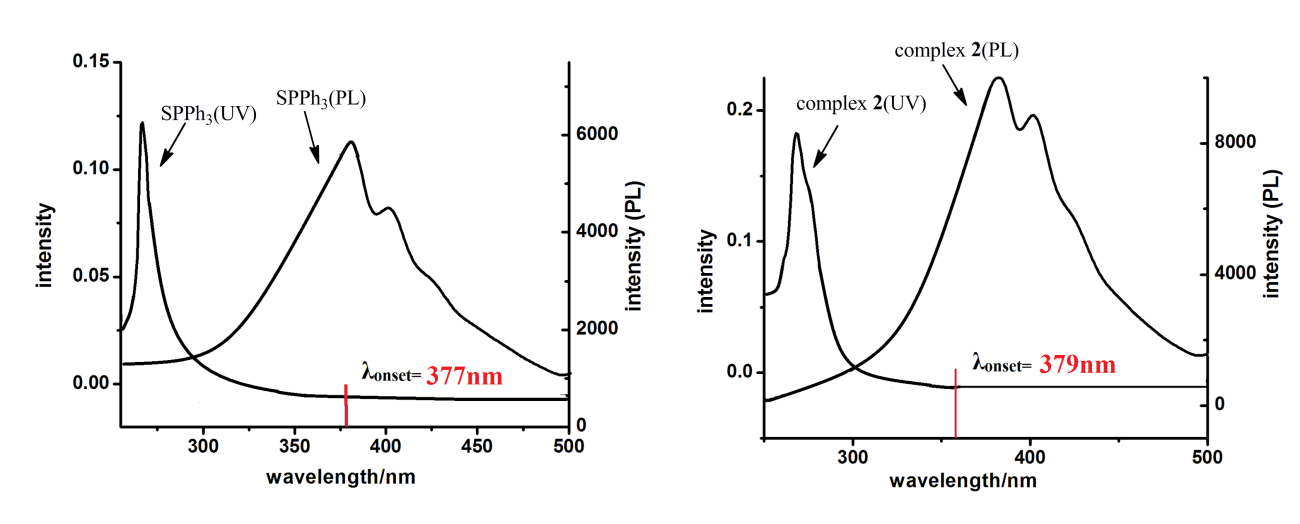


Figure S4. UV-vis absorption and photoluminescence spectra of SPPh3 and complex **2** in the solid state.
